# Supplementary material
Source: PubMed Central journal article supplement (PMC4933462)
Supplement: supp_M116.727727_SupplementalMaterialsForM727727.pdf [file supp_M116.727727_SupplementalMaterialsForM727727.pdf]

Characterization of the Interactions between Calmodulin and Death Receptor 5 in Triple-Negative and Estrogen Receptor Positive Breast Cancer Cells: An Integrated Experimental and Computational Study\*

**Romone M. Fancy<sup>1</sup>, Lingyun Wang<sup>1</sup>, Qinghua Zeng<sup>1</sup>, Hong Wang<sup>2</sup>, Tong Zhou<sup>2</sup>, Donald J. Buchsbaum<sup>3</sup>, Yuhua Song<sup>1</sup>**

Department of Biomedical Engineering<sup>1</sup>, Medicine<sup>2</sup> and Radiation Oncology, University of Alabama at Birmingham, Birmingham, AL 35294.

\*Running Title: Calmodulin and death receptor 5 interactions in breast cancer cells

## **Supporting Materials**

To whom correspondence should be addressed: Yuhua Song, Department of Biomedical Engineering, The University of Alabama at Birmingham, 803 Shelby Interdisciplinary Biomedical Research Building, 1825 University Boulevard, Birmingham, AL 35294, Tel.: (205) 996-6939; Fax: (205) 975-4919; Email: [yhsong@uab.edu](mailto:yhsong@uab.edu); Web: <http://labs.uab.edu/yhsong/>

**Keywords:** Calmodulin, death receptor 5, protein interactions, breast cancer, integrated experimental and computational study

†This work was supported in part by an NIH K25 award (5K25 CA140791) to Y.S.

**Table S1.** PCR primers for generating DNA constructs of DR5 fragments used in the study

|             |                                 |
|-------------|---------------------------------|
| DR5CR 5'    | CTCGAGTTAGGACATGGCAGAGTCTGC     |
| DR5CR 3'    | CTCGAGTTAGGACATGGCAGAGTCTGC     |
| DR5DD 5'    | CACCGGATCCCCAGCAAATGAAGGTGATCCC |
| DR5DD 3'    | CTCGAGTTACAACAAGTGGTCCTCAATCTT  |
| DR5DDdel 5' | AGCTCTGGAAAGTTCATGTAT           |
| DR5DDdel 3' | AACCAGCAGCCTCCTCCTCTG           |
| DR5BSD 5'   | ATGGACAATGAGATAAAGGTG           |
| DR5BSD 3'   | GGAGTCAAAGGGCACCAAGTC           |
| DR5E355K 5' | AAGCCGCTCATGAGGAAGTTG           |
| DR5E355K 3' | CCAGGAGTCAAAGGGCACC             |
| DR5R359A 5' | GCCAAGTTGGGCCTCATGGAC           |
| DR5R359A 3' | CATGAGCGGCTCCCAGGAGTC           |

**Table S2.** Stereochemical quality scores of the DR5 DD models.

| <b>Template</b> | <b>PROCHECK<sup>a</sup></b> |                         |                                    |                            | <b>ERRAT<sup>b</sup></b> | <b>WHATCHECK<sup>c</sup></b>   | <b>Verify_3D<sup>d</sup></b>   |        |       |
|-----------------|-----------------------------|-------------------------|------------------------------------|----------------------------|--------------------------|--------------------------------|--------------------------------|--------|-------|
|                 | <i>Favored residues</i>     | <i>allowed residues</i> | <i>generously allowed residues</i> | <i>disallowed residues</i> | <i>Packing quality</i>   | <i>Ramachandram appearance</i> | <i>X1/X2 rotamer normality</i> |        |       |
| 1ICH+1DDF       | 98.7%                       | 1.3%                    | 0.0%                               | 0.0%                       | 90.8                     | -2.281                         | 2.918                          | -1.666 | 77.7% |

- PROCHECK evaluates the residual  $\phi/\psi$  angles in the Ramachandran plots. The good model should not have no disallowed residues shown by PROCHECK.
- ERRAT analyzes patterns of non-bonded interactions and gives an overall quality score for the entire model and good models generally produce scores above 80.
- WHATCHECK does extensive checking of many stereochemical parameters of the residues in the model. While a positive score means better than average, a negative score of -4.0 or lower indicates a serious problem with the structure.
- Verify\_3D: analyzing the compatibility of an atomic model (3D) with its own amino acid sequence (1D). The good model should have the more than 75% score for Verify\_3D.
